1 **Viral dynamics and immune responses to foot-and-mouth disease virus in African buffalo (*Syncerus caffer*).**

2 Eva Perez-Martin\*<sup>1</sup>, Brianna Beechler\*<sup>2</sup>, Katherine Scott<sup>3</sup>, Lin-Mari de Klerk-Lorist<sup>4</sup>, Fuquan Zhang<sup>1,5</sup>, Georgina  
3 Limon<sup>1</sup>, Brian Dugovich<sup>2</sup>, Simon Gubbins<sup>1</sup>, Arista Botha<sup>6</sup>, Nicholas Juleff<sup>7</sup>, Robyn Hetem<sup>8</sup> Louis van Schalkwyk<sup>4</sup>,  
4 Francois F. Maree<sup>3</sup>, Anna Jolles<sup>2</sup>, Bryan Charleston<sup>1#</sup>

5

6 <sup>1</sup> The Pirbright Institute, Woking, Surrey, United Kingdom

7 <sup>2</sup> Carlson College of Veterinary Medicine, Oregon State University, Corvallis, OR, USA

8 <sup>3</sup> ARC-OVI Transboundary Animal Disease section (TAD), Vaccine and Diagnostic Development Programme,  
9 Onderstepoort, Gauteng, South Africa.

10 <sup>4</sup> State Veterinary Services, P.O. Box 12, Skukuza, 1350, South Africa

11 <sup>5</sup> UCL Institute of Prion Diseases, London, United Kingdom

12 <sup>6</sup> Brain Function Research Group, School of Physiology, Faculty of Health Sciences, University of the  
13 Witwatersrand, Johannesburg, South Africa

14 <sup>7</sup> Bill and Melinda Gates Foundation, Seattle, USA.

15 <sup>8</sup> School of Animal, Plant and Environmental Sciences, University of the Witwatersrand, Johannesburg, South  
16 Africa

17

18 \*equal contribution

19 #Corresponding author

20 Abstract

21 Foot-and-mouth disease (FMD) is one of the most important livestock diseases restricting international trade.

22 While it is clear that African buffalo (*Syncerus caffer*) act as the main wildlife reservoir, viral and immune response

23 dynamics during FMD virus acute infection have not been described before in this species. We used experimental  
24 needle inoculation and contact infections with three Southern African Territories serotypes to assess clinical,  
25 virological and immunological dynamics for thirty days post infection. Clinical FMD in the needle inoculated  
26 buffaloes was mild and characterised by pyrexia. Despite the absence of generalised vesicles, all contact animals  
27 were readily infected with their respective serotypes within the first 2-9 days after being mixed with needle  
28 challenged buffaloes. Irrespective of the route of infection or serotype there were positive associations between  
29 the viral loads in blood and the induction of host innate pro-inflammatory cytokines and acute phase proteins.  
30 Viral loads in blood and tonsils were tightly correlated during the acute phase of the infection, however, viraemia  
31 significantly declined after a peak at 4 days post infection (dpi), which correlated with the presence of detectable  
32 neutralising antibodies. In contrast, infectious virus was isolated in the tonsils until the last sampling point (30 dpi)  
33 in most animals. The pattern of virus detection in serum and tonsil swabs was similar for all three serotypes in the  
34 direct challenged and contact challenged animals.

35 We have demonstrated for the first time, that African buffalo are indeed systemically affected by FMD virus and  
36 clinical FMD in buffalo is characterized by a transient pyrexia. Despite the lack of FMD lesions, infection of African  
37 buffalo was characterised by high viral loads in blood and oropharynx, rapid and strong host innate and adaptive  
38 immune responses and high transmissibility.

39

40 Keywords: African buffalo, FMDV, viral dynamics, host-viral interaction, innate immune response, acute phase  
41 proteins, co-infection,

## 42 **1. Introduction**

43 Foot and mouth disease (FMD) is an acute vesicular viral disease of domesticated and wild *Artiodactyla*  
44 characterized as highly contagious with a very short incubation period. In the acute stages of disease in FMD  
45 susceptible livestock, clinical signs include fever, blister-like lesions followed by erosions on the tongue, mouth,  
46 snout and feet [1]. FMD is one of the most important livestock diseases that is endemic in Africa and causes  
47 serious socio-economic impact in the livestock industry and inhibits international trade [2].

48 FMD virus (FMDV) is a small (30nm in diameter) roughly spherical, non-enveloped positive-sense single-stranded  
49 RNA picornavirus of the genus *Aphthovirus*. Given its serological diversity, FMDV is classified into 7 serotypes: A,  
50 O, Asia1 and C (also named Eurasian serotypes) and the Southern African Territories (SAT) 1, 2 and 3 with varying  
51 global distribution and causing indistinguishable disease [3]

52 FMDV is mainly transmitted directly from infected animals in close contact with naïve animals during acute  
53 infection. FMDV has a very high rate of transmission and  $R_0$  values during early stages of the disease, are  
54 considered to be 21-88 for cattle, 1-14 for sheep [4-6] and very recently, the  $R_0$  estimated for African buffalo was  
55 5-15.8 [7]. In cattle, the onset of clinical signs occurs 3-4 days after infection and transmission occurs on average,  
56 0.5 days after the appearance of clinical signs [8] when very high titres of virus are found in the damaged  
57 epithelium due to vesicle formation and vesicular fluid [9]. In contrast to cattle, African buffalo develop a sub-  
58 clinical or inapparent infection after being experimentally infected with high doses of the three SAT serotypes,  
59 while the same virus strains in young Nguni cattle caused fatal and acute FMD [10]. In cattle, the oropharyngeal  
60 mucosa is the primary site of replication after natural infection, with subsequent dissemination to the lungs  
61 followed by viraemia of about 3-5 days of duration [11]. The major mechanism of controlling FMDV infection is  
62 the induction of neutralizing antibodies which are detected as soon as 4 days post-infection (dpi), peak at 14 dpi  
63 and are maintained for very long periods of time (years) [1]. The humoral immune response induced by infection  
64 or vaccination, protects the animal against FMD but does not consistently prevent replication in the oropharynx  
65 and establishment of persistent infection or the carrier status [12].

66 An innate non-specific immune response based on type I and III IFN has been described to play a role in the early  
67 protective response against FMDV in pigs and cattle [13-15]. In fact, even though FMDV has developed  
68 mechanisms to antagonize the IFN response *in vitro* [16] type-I/III IFN is readily detected in serum after FMDV  
69 infection in cattle, pigs, mice and African buffalo [10, 17].

70 Enhanced production of acute-phase proteins (APPs), haptoglobin and serum amyloid A (SAA) in serum, have  
71 been described in cattle during acute infection with FMDV [18]. Interestingly, detection of APP has been used as  
72 an indicator of a range of infectious diseases to monitor progression of disease, as a marker to assess animal

73 health and welfare at farms or slaughterhouses, antibiotic treatment efficacy and recently as a biomarker of other  
74 infections in African buffalo[19].  
75 Most African buffalo in sub-Saharan Africa are endemically infected with all three SAT serotypes [20-22] and are  
76 also considered the main, and for some authors, the sole FMDV reservoir [23] as they may become persistently  
77 infected for many years [24, 25]. Controlling transboundary diseases such as FMD is critical to significantly  
78 improve livestock productivity in endemic regions and allow international trade in livestock products [26]. FMD  
79 control in sub-Saharan Africa provides unique challenges because the SAT serotypes are maintained in wildlife  
80 and act as a source of infection for livestock [27, 28]. Therefore, an important element of FMD control in livestock  
81 in Africa is understanding the pathogenesis and transmissibility in African buffalo. SAT2 is the most widely  
82 distributed serotype and is also the serotype most often associated with outbreaks in livestock and wildlife,  
83 followed by SAT1 and then SAT3 [29-31]. However, in contrast to cattle, little information is known about the viral  
84 dynamics, shedding, transmission rates, and host-immune responses during the acute infection in African buffalo.  
85 Therefore, the aim of this study was to fill the knowledge gaps of FMDV infection dynamics and immune-  
86 pathogenesis in African buffalo following needle or direct contact infection with three SAT FMDV serotypes. ▸  
87 Parameters such as viraemia, viral shedding, clinical outcome and fever, as well as the systemic levels of APP in  
88 serum and innate and adaptive immune responses were analysed. Despite the lack of visible clinical signs,  
89 infected buffaloes show high body temperature, high virus titres in blood and nasopharynx, and readily transmit  
90 the virus to naïve buffalo.

## 91 **Materials and methods**

### 92 **Experimental design and sampling**

93 Twenty-four African buffalo (*Syncerus caffer*) were donated by the Hluhluwe-Imfolozi Game Reserve, South  
94 Africa; confirmed free from antibodies to FMDV by the OIE Regional Reference Laboratory (ARC-OVI) and  
95 transferred to experimental animal facilities at Skukuza, State Veterinary Services (SVS), Kruger National Park  
96 (KNP). Animals were allowed one month for acclimatisation and daily monitoring of the health was performed  
97 throughout the experiment. Experimental protocols were approved by of the Department of Agriculture, Forestry

98 and Fisheries (DAFF) (Section 20: 12/11/1/8/3/) and the SANParks Animal Ethical Committee (N013-12). Animals  
99 were sedated with etorphine hydrochloride and xylazine during experimental procedures and sample collection.  
100 The 24 buffalo, 12 female and 12 male, aging between 10 and 24 months were randomly divided into six identical  
101 groups (four animals each). Animals in three groups were subepithelially challenged with either SAT1, SAT2 or  
102 SAT3 FMDV, at a dose of  $2.5 \times 10^5$  TCID<sub>50</sub> in the tongue. These groups will be referred in the manuscript as “needle  
103 infected” (NI) animals. Two days after the challenge, the remaining three groups of four naive buffalo were mixed  
104 with each of the three inoculated groups; these animals are referred as “contact animals”. FMDV Infection  
105 dynamics was studied in the buffalo following needle and natural exposure of each of the SAT viruses during the  
106 acute phase for 30 days.

107 Buffalo were monitored for the presence of FMD clinical signs and sampled on days 0 (day of the needle  
108 infection), 2, 4, 6, 8, 11, 14 and 30 day post-infection (dpi). Sample collection included blood, oropharyngeal  
109 scraping (probang), nasal and tonsil swabs. Whole blood samples collected from the jugular vein were centrifuged  
110 to extract serum to measure pro-inflammatory cytokines (type I/III IFN, IFN $\gamma$ , TNF $\alpha$ ) and APP by ELISA; and specific  
111 humoral immune response measurement by virus neutralization test (VNT) and ELISA. Blood samples were also  
112 collected in EDTA for leucocyte counts immediately after collection on a Coulter T-890 (Beckman). EDTA blood,  
113 probang and tonsil swab samples were collected for the detection of FMDV by qRT-PCR and virus isolation.  
114 Probang samples were obtained by gentle erosion of the oropharyngeal epithelium with the probang cup [32].  
115 Epithelium was resuspended in 3ml of probang buffer (Eagles-hepes supplemented with penicillin/streptomycin  
116 (Sigma)) and snap frozen in liquid nitrogen. Left and right palatine tonsils were swabbed individually with nylon  
117 brushes (Cytotak™ Transwab, Medical Wire), dipped in criovials containing 0.5 ml of probang buffer and snap  
118 frozen in liquid nitrogen[10]. Cotton nasal swabs (Salivette<sup>R</sup>) were soaked in 0.5ml of PBS and introduced into  
119 both nostrils to collect nasal fluid. Swabs were then centrifuged, the liquid collected and aliquoted. All samples  
120 were stored at -80C until processing.

## 121 **Viruses and cell lines**

122 Virus isolates used for animal challenge were SAT1/KNP/196/91, SAT2/KNP/19/89 and SAT3/KNP/10/90 with  
123 accession numbers KR108948, KR108949 and KR108950, respectively. These viruses are originally from buffalo in  
124 KNP, isolated in primary porcine kidney cells (PK) and propagated in IB-RS-2 porcine cell line [10].  
125 IB-RS-2 cells were also used for the virus neutralization assay. ZZR-127 goat epithelial cells were used for virus  
126 isolation from tonsil swabs and probang samples and sera [33]. MDBK-t2 cells (Madin-Darby bovine kidney) cells  
127 transfected with a plasmid expressing the human MxA promoter driving a chloramphenicol acetyltransferase  
128 (CAT) cDNA were used for the antiviral assay to detect Type I/III IFNs [34]. Cell lines were maintained in minimal  
129 essential medium (MEM) supplemented with nutrient F-12 (ZZR-127 cells), hepes, L- glutamine, 10% foetal calf  
130 serum and antibiotics (penicillin 100 U/ml and penicillin 100ug/ml). MDBK-t2 cells were also supplemented with  
131 10ug/ml of blasticidin (Invitrogen, CA).

### 132 **Measurement of the body temperature by subcutaneous devices**

133 Body temperature was measured using temperature-sensitive data loggers implanted in each animal of the  
134 needle infected groups, as previously described [35]. Experimental protocols were approved by the Animal  
135 Research Ethics Committee of the University of the Witwatersrand: 2015/07/31/C. Briefly, animals under sedation  
136 were injected with a local anaesthetic in the flank, the area was shaved, disinfected with chlorhexidine gluconate  
137 (Hibitane, SA) followed by an incision of the skin of about 5 cm. Data loggers were implanted below the skin and  
138 panniculus muscle into the flank and secured to the muscle with nylon sutures (NY924, size 0, SA). The surgical  
139 site was sutured closed with dissolvable sutures (Viamac VM514, size 2) and the surgery wounds sprayed with an  
140 antiseptic spray (Necrospray, Centaur Labs).

141 Figure 1 shows the variation of residuals through-out the experiment for SAT 1,2, 3 and the raw temperature for  
142 each individual. Adjusted body temperatures from the implanted animals before being exposed to FMDV were  
143 used to create a reference range (Additional figure 1). We fitted a nonlinear curve to the animals data over time  
144 so we could better include time in our assessment of body temperature. One animal had repeated outlier  
145 readings (as measured in a ROUT Analysis <sup>1</sup>, Q=10%) so was omitted, resulting in n=11. A nonlinear curve with a  
146 sine function was fit to the data using robust nonlinear regression with constraints of amplitude >0, wavelength

147 =1, frequency = 1 day and phase shift between 0 and 6.3 (2 $\pi$ ). The residuals were evaluated and found to vary  
148 between -1.057 and 1.042 ( $\sim 39^\circ\text{C}$ ). The best fit values for this line are amplitude =0.492, wavelength =1  
149 (constrained), Phaseshift = 3.378, frequency =1 and baseline temperature =38.29C. We calculated the residuals  
150 for the experimentally infected animals using the fitted nonlinear curve shown in Figure 1a with any value above a  
151 residual of 1.042 being considered a fever (above  $\sim 39^\circ\text{C}$ ), and omitting any time point within 1 hour of a capture  
152 period. Using these residuals, we were able to calculate the length of each fever and the time it began. We also  
153 reported the peak temperature reached and the time point at which it was reached. To calculate the initial  
154 timepoint an animal mounted a fever and remove small fluctuations that may not be fever we took the time point  
155 at which at animal mounted a fever (first residual above 1.042) if the fever was sustained (all residuals above  
156 1.042) for at least 6 consecutive hours. For the return to normal body temperature, we applied the same  
157 requirement, residuals had to be below 1.042 for at least 6 consecutive hours.

#### 158 **FMDV RNA detection in serum, probang, nasal and tonsil swabs by reverse transcriptase qPCR (RT-qPCR)**

159 RNA templates were extracted from 100ul of sample (serum, probang, nasal and tonsil swab) to a final elution  
160 volume of 80ul using MagNA Pure LC RNA isolation kit (Roche) and the KingsFisher Flex 96 robot (Thermofisher) .  
161 Viral load was determined by means of RT-qPCR using primers targeting the conserved 3D<sup>pol</sup>-coding region of  
162 FMDV genome [36]. SAT serotype-specific primers and probes as previously described [10] were also used in  
163 tonsil swab samples. Forty cycles of PCR were carried out on a Stratagene Mx3005P QPCR system using MXPro  
164 MX3005 v3 software (Stratagene, UK). Cycle threshold (Ct) values were converted to FMDV genome copy number  
165 (GCN) by using a linear regression model with serial dilutions of *in vitro* synthesized RNA standard. Results were  
166 expressed as Log<sub>10</sub> GCN/ml of sample. A cut-off of 1 GCN/5ul of RNA was used for all samples which resulted in  
167 detection thresholds of 2.2 log<sub>10</sub> FMDV GCN/ml of sample.

#### 168 **Air sampling**

169 To investigate the possible aerosol transmission of FMDV in buffalo, we collected the aerosols exhaled by the NI  
170 buffalo using a Coriolis Air Sampler (Bertin Technologies) [37]. The Coriolis Air Sampler collects the aerosols in a  
171 plastic bottle filled with Eagles media with antibiotics that is connected to a high volume vacuum pump with an

172 airflow rate of 300 liters/min. The air Sampler was positioned approximately 1 meter away from the mouth of the  
173 NI animals under sedation for 10 minutes, on days 0, 2, 4, 6 and 8 of the experiment. Aliquots of 1ml of media  
174 collected from the plastic bottle was analysed by RT- qPCR for the detection of viral particles.

#### 175 **Virus isolation**

176 Virus isolation from the oropharynx (OP) samples (probang and tonsil swab) and serum was performed in a  
177 monolayer of ZZR-127 goat epithelial cells following the procedures described by the Office International des  
178 Epizoties Manual of Diagnostic test (OIE Manual, 2021). When no cytopathic effect was observed after 48 hours  
179 of incubation a second passage of virus was performed on new ZZR-127. Positive cytopathic effects were  
180 confirmed for the presence of FMDV by RT-qPCR.

#### 181 **Detection of FMDV neutralizing antibodies by virus neutralization test (VNT)**

182 Serum samples were assayed for the presence of homologous neutralizing anti-FMDV antibodies by virus  
183 neutralization test (VNT) as described elsewhere [38]. Briefly, 2-fold dilutions of serum are incubated with 100  
184 TCID<sub>50</sub> of SAT1, 2 or SAT3 FMDV in a monolayer of IB-RS-2 cells in 96well plates for three days. Number of wells  
185 with cytopathic effect (CPE) are counted and titres are expressed as the Log<sub>10</sub> of the reciprocal of the highest  
186 dilution of serum that neutralized the virus in 50% of the wells. Titres >1.6 Log<sub>10</sub> are considered to reach the  
187 threshold of protection according to Barnett and colleagues [39]

#### 188 **Detection of FMDV antibodies against the non-structural proteins by ELISA**

189 Serum samples were analysed for the detection of antibodies against the viral non-structural proteins (NSP). A  
190 PrioCHECK FMDV NS ELISA (Prionics®, The Netherlands) was performed according to the manufacturers'  
191 specifications. Results more than 50% of percentage of inhibition (PI) are considered positive.

192

#### 193 **Determination of type I/III IFN, TNF- $\alpha$ and IFN- $\gamma$ in serum**

194 An Mx/chloramphenicol acetyltransferase (Mx-CAT) reporter assay was used to determine the levels of  
195 biologically active IFN in serum samples (Fray et al., 2001). Briefly, serum samples were incubated on MDBK-t2



196 cells for 24h at 37°C and 5% CO<sub>2</sub>. Cells were then lysed in lysis buffer and CAT expression, induced by antiviral  
197 proteins present in the serum, was determined from the cell lysate using an ELISA kit (Roche) in accordance with  
198 the company instructions. Units of antiviral activity per ml of serum were calculated from a standard curve using  
199 recombinant bovine IFN- $\alpha$  [40]. A cut-off of 0.76 iu/ml was established by measuring the average of the basal  
200 levels plus 2 times the standard deviation.

201 The levels of TNF- $\alpha$  in buffalo sera were determined by means of ELISA using a commercial kit (RayBio ELB-TNF- $\alpha$ )  
202 according to the manufacture's protocol. Results are expressed as  $\mu\text{g/ml}$  of serum. A cut-off of 1.76  $\mu\text{g/ml}$  was  
203 established by measuring the average of the basal levels plus 2 times the standard deviation.

204 The quantitative determination of IFN- $\gamma$  in buffalo serum was assayed by a commercial bovine IFN gamma  
205 sandwich ELISA test (Bio-Rad) following the manufacture's specifications. Results are expressed as  $\mu\text{g/ml}$   
206 extrapolated from a standard curve of recombinant bovine IFN- $\gamma$ . A cut-off of 1.04  $\mu\text{g/ml}$  was established by  
207 measuring the mean of the basal levels and adding 2 times the standard deviation of to the mean value.

#### 208 **Determination of acute phase proteins in serum: serum amyloid A (SAA) and haptoglobin**

209 Buffalo serum samples were tested for the levels of serum amyloid A (SAA) protein in a sandwich ELISA based on  
210 the instructions provided by the manufacturer (Life Diagnostics). Results are reported as ng/ml. A cut-off of 546  
211 ng/ml was established by measuring the average of the basal levels plus 2 times the standard deviation for the  
212 single and co-infection experiments, respectively.

213 A commercial kit (Life Diagnostics, Inc) specific for bovine and based on a sandwich ELISA was used for the  
214 quantitative determination of haptoglobin in buffalo serum following the instructions. Results are expressed as  
215 ng/ml. A cut-off of 802 ng/ml was established by measuring the average of the basal levels plus 2 times the  
216 standard deviation.

#### 217 **Statistical analysis**

218 Data on maximum body temperature, peak, initial elevation, and duration of high temperature was analysed by R  
219 (version 3).

220 Virus load in serum and tonsil swab samples, FMDV immune response (VNT, TNF, Interferon  $\gamma$  and type I/III IFN  
221 and acute phase of proteins in serum (Haptoglobin and SAA) over time were analysed by determining, for each  
222 animal, the area under the curve (AUC), maximum value and day when the peak value was detected. For virus  
223 load (in serum and tonsil swab), VNT and NSP, first day with a positive value was also identified. Finally, duration  
224 of shedding was estimated for virus load in serum; duration was defined as the interval between the midpoint of  
225 first observation with a  $\log_{10}$  value and the preceding negative observation and the midpoint of last observation  
226 with a  $\log_{10}$  value and the subsequent negative observation). The response time was measured as time of the first  
227 positive value for each parameter minus the first day that FMDV is detected (presence of FMDV in tonsil, blood or  
228 nose).

229 All measurements were compared for NI animals and contact animals (regardless of the serotype) and different  
230 serotypes among needle infected animals and contact animals (corrected by time of exposure) using Kruskal  
231 Wallis test. Median, minimum and maximum values and the Kruskal-Wallis statistics of virus loads, serology and  
232 immunological values stratified by serotype (SAT1, SAT2 and SAT3) is shown in additional table 1. Median,  
233 minimum and maximum values and the Kruskal-Wallis statistics of virus loads, serology and immunological values  
234 stratified by method of infection (needle versus contact) is shown in additional table 2. Correlation between  
235 viremia levels and FMDV in tonsils was done by Spearman's rank test.

236

## 237 **Results**

### 238 **Transmission of FMDV from needle inoculated to in-contact buffalo**

239 FMDV was transmitted readily from NI animals to all in-contact buffalo within the first week of being mixed.  
240 FMDV was first detected in serum and or tonsil and nasal swabs in all NI animals synchronous at 2 dpi; and as  
241 expected, FMDV detection in the in-contact buffalo was more variable within and between groups and delayed  
242 ( $p < 0.014$ ) compared to NI. Therefore, the analysis of the values of the immunological parameters in the in-contact  
243 groups accounted for the day that virus was first detected. The first detection of FMDV infection of the in-contact

244 animals was not significantly different between groups challenged with the different serotypes ( $p=0.103$ ). FMDV  
245 was not detected in any of the air samples collected adjacent to the NI animals after infection (data not shown).  
246 Infection was delayed in one animal in the SAT3 in-contact group, with FMDV first detected on day 9, and was  
247 omitted from analysis due to the limited samples available post onset of infection.

#### 248 **Clinical signs, body temperatures and leukocyte counts**

249 After FMDV challenge there was no significant change in total white blood cell count (Additional figure 2) and only  
250 minor mouth lesions were seen in 3 out of 24 animals (two animals from SAT1 NI and one from SAT3 in-contact  
251 groups), at 6-11 dpi. Lesions consisted of small, rounded vesicles of around 4 mm diameter, in the upper dental  
252 pad. No lesions were observed in the coronary band or in the tongue, except for the needle tracks where the  
253 inoculation occurred.

254 As shown in figure 1 and table 1, body temperatures were elevated ( $>39.5^{\circ}\text{C}$ ) after infection (between 1-1.7 dpi,  
255 in all animals and remained elevated for between 2-5 dpi with a peak of maximum temperature of  $>41^{\circ}\text{C}$  between  
256 1.5-3.1 dpi. The SAT2 group showed a quicker response time to initial elevation (1 dpi) compared to 1.3 and 1.4  
257 days for SAT1 and 3, respectively ( $p=0.008$ ) and a longer duration of 5.3 days *versus* 3.01 and 2.96, for SAT1 and  
258 SAT3, respectively ( $p=0.016$ ). All animals from SAT1 and one animal from SAT3 infected groups, showed a short  
259 second peak of pyrexia at 8 dpi that lasted approximately 1 day.

260

#### 261 **Viral dynamics in blood, nasal swabs and oropharynx**

262 Virus genome dynamics in serum samples from NI animals were comparable in all three groups (Figure 2a). The  
263 highest FMDV genome copy number was detected by 2 dpi in all the NI animals. Detection of virus genome in  
264 blood declined during 4-6 dpi and were undetectable by 8 dpi.

265 Virus genome dynamics in serum from in-contact animals was more variable within each group and differences  
266 were observed between serotypes. The SAT2 in-contact group showed significantly lower genome copy numbers  
267 in serum with averages of 2.57 GCN/ml *versus* 3.24 and 3.42 GCN/ml for SAT3 and SAT1, respectively ( $p<0.028$ ),

268 while virus genome was detected earlier in the SAT1 in-contact animals compared to the SAT2 and SAT3 animals  
269 ( $p = 0.017$ ). Also, the duration of detectable genome in serum was longer for the SAT1 group (6.5 days) compared  
270 to the SAT2 (4.5 days) and SAT3 (2.5 days) animals ( $p = 0.021$ ).

271 FMDV genome could be detected in the oropharynx (OP) at 2 dpi regardless of the route of infection, (Figure 2b) .  
272 In general, GCN values peak between 3 to 6 dpi, except for SAT3 in-contact animals which showed a significant  
273 delay (5 to 12dpi) ( $p < 0.045$ ). FMDV genome was detected in all tonsil swabs until day 30 of the experiment. NI  
274 animals had higher GCN in OP compared to in-contact infected animals from day 2 to day 30 of the experiment  
275 ( $p = 0.004$ ), with the SAT1 NI group showing higher values (5.43 GCN/ml), compared to SAT2 and SAT3 NI groups  
276 (5.39 GCN/ml and 5.27 GCN/ml) ( $p = 0.048$ ). By 30 dpi, tonsil swabs were analysed by qRT-PCR using SAT specific  
277 primers (Table 2) and results indicated that no evidence of cross-infection was detected in any of the groups  
278 housed separately during the experiment.

279 Virus genome was first detected in nasal swabs on 2 and 6.5 dpi (group mean values) in NI and in-contact groups,  
280 respectively (Figure 2c). Most of the animals were negative by 14 dpi. Contrary to the high GCN in blood and OP,  
281 virus genome detection in nasal swabs was intermittent and reached maximum values of 3.4 and 3.34 GCN/ml in  
282 NI and in-contact groups, respectively. No statistical differences in the dynamics of shedding in nasal swabs were  
283 observed between groups.

284 Serum, probang, and tonsil and nasal swabs were also analysed by virus isolation (VI) from 2-30 dpi of the  
285 experiment (Table 2). On day 2 and 4 after virus exposure, only 66% and 17% respectively of the serum samples  
286 were positive for virus isolation which contrasts with the high qRT-PCR values in all serum samples on these days.  
287 Virus was isolated from 87% and 71% of the qRT-PCR positive samples from tonsil swab and probang,  
288 respectively, on days 8, 14 and 30 of the experiment. Also, the mean GCN from all VI positive samples was higher  
289 in tonsil swabs ( $p < 0.001$ ) (Additional figure 3) thus indicating ~~that~~ tonsil swab is the most reliable method for  
290 detecting FMD live virus and genome in African buffalo. On day 30 of the experiment infectious virus was isolated  
291 from tonsil swabs and/or probang from 16 (9 NI and 7 in contact), out of 24 (66.6%) infected animals (Table 3),

292 however there was no association of level of viral loads in oropharynx or route of virus exposure with the carrier  
293 status ( $p=0.33$  and  $P=0.553$ , respectively). Infectious virus could not be isolated from any nasal secretions.

#### 294 **Humoral immune response to FMDV**

295 The specific humoral immune responses induced by the different FMDV SAT serotypes after NI were not  
296 significantly different, however differences are observed in in contact groups. (Figure 3a). In general, FMDV  
297 infected buffalo developed virus neutralizing antibody titres (VNTs) within 2 to 6 days post virus exposure. VNTs  
298 rapidly increased after first detection and were maintained at their maximum titres until the end of the study on  
299 day 30. The route of infection did not influence the magnitude of the VNTs but NI reached protective titres faster  
300 compared to contact ( $p<0.002$ ) and among the contact animals, the onset of the response was faster in SAT1  
301 group ( $p<0.021$ ), showing comparable levels with NI animals.

302 Antibodies against the non-structural proteins (NSP) of FMDV were first detected at 8 dpi for the NI groups and  
303 significantly delayed in the in-contact groups (12 dpi,  $p = 0.001$ ). The NSP antibody titres remained consistently  
304 elevated until 30 dpi (Figure 3b).

#### 305 **Levels of Haptoglobin and SAA in serum of FMDV infected buffalo**

306 Serum amyloid A (SAA) and haptoglobin were detected during acute FMD infection in buffalo. High  
307 concentrations of SAA were detected in serum of all animals immediately after virus infection (Figure 4a). Serum  
308 concentrations rapidly increased and peaked by 4-6 dpi. Levels declined progressively after the peak and by 14 dpi  
309 SAA levels were undetectable. While the total SAA response was not different across serotypes and route of  
310 infection, the induction of SAAs was delayed in in-contact animals ( $p<0.004$ ), however, their peak levels were  
311 higher compared to NI ( $p<0.007$ ).

312 Similar dynamics were observed in the concentration of haptoglobin in serum (Figure 4b) although levels were  
313 maintained for longer than SAA; by 30 dpi haptoglobin levels in all animals were normal. No differences in  
314 haptoglobin in serum were observed after the different routes of infection, but the magnitude of the response  
315 was the highest within the SAT2 NI groups ( $p<0.018$ ).

## 316 **Innate immune response induced in FMDV infected buffalo**

317 The dynamics of Type I/III IFNs and IFN $\gamma$  in serum were very similar in response to all SAT infections (Figure 4c).  
318 Type I/III IFN were detected in the serum for approximately 6 dpi with a peak of 2 dpi for NI and 6 days after in-  
319 contact challenge ( $p=0.013$ ). Similarly, the induction of IFN $\gamma$  was detected at 2 dpi and peaked at 6 dpi with  
320 maximum values for in-contact animals higher than NI ( $p=0.036$ ) (Figure 4d). No differences in dynamics of  
321 Type I/III IFN and IFN $\gamma$  antiviral cytokines were found across serotypes, however some animals from the in-contact  
322 group had detectable levels to these cytokines even before FMDV was detected ( $p=0.031$ ).  
323 TNF $\alpha$  could not be consistently detected in FMDV infected buffalo (data not shown).

324

## 325 **Discussion**

326 This study represents the most complete characterization of viral dynamics and immune responses to FMDV  
327 infection in African buffalo. FMD in African buffalo is generally regarded as mild or asymptomatic, since no (or  
328 very few) vesicles are observed even after a high dose of FMDV challenge [10, 41, 42]. Consistent with these  
329 previous reports, small vesicles restricted to the dental pad were only observed in two SAT1 NI buffaloes and one  
330 SAT3 in-contact challenged buffalo, contrary to cattle that present with vesicles at multiple sites, generally on the  
331 feet and tongue, after the onset of fever [1]. However, using temperature loggers, we demonstrated for the first  
332 time that African buffalo are indeed systemically affected by FMDV and develop consistent pyrexia responses  
333 early after needle infection (1-2 dpi) that last for approximately 3 to 5 days. Recent results highlighted that cattle  
334 with FMDV are substantially less likely to be infectious before showing clinical signs, including pyrexia and a  
335 significant increase of greater than 1°C in body temperature has been considered to be a good indicator of the  
336 onset of FMD clinical signs after experimental challenge [8]. In fact, temperature has also been considered a good  
337 correlate of transmission of FMDV [9]. In the absence of FMD lesions body temperature could probably be the  
338 most important correlate of transmission in African buffalo. Interestingly, SAT2 NI showed an earlier increased  
339 temperature and for longer compared to SAT1 and SAT3 infected animals, however the increased temperature

340 was not associated with a higher virus load in serum or virus replication in the oropharynx. Within one week of  
341 FMDV exposure, buffalo also showed high levels of SAA in serum, similar to the profile detected in cattle [18].  
342 Interestingly, SAT2 NI animals showed higher levels of haptoglobin in serum ( $p < 0.018$ ) compared to SAT1 and  
343 SAT3 challenged animals. Acute phase proteins are non-specific markers of inflammation, and although most  
344 buffalo did not show FMD lesions, they were all systemically affected by virus infection. Therefore, these proteins  
345 could be used as a surrogate marker of FMDV infection in African buffalo, as previously suggested [19].

346 It has been described that FMDV in cattle is highly contagious and  $R_0$  have been estimated to be between 21-88,  
347 [4, 6] even though the infectious period is brief (1.7 (0.3-4.8) days) [9]. Moreover, in domestic cattle there is a  
348 positive association between transmission, and presence of virus in air, and the onset of FMD clinical signs [8]. In  
349 this study, despite the lack of vesicles, and the absence of virus in air samples, all contact buffalo were readily  
350 infected after being in contact with the NI animals. Indeed, high levels of virus and virus genome were detected in  
351 the palatine tonsils by qRT-PCR and virus was isolated during the first 4-6 days after infection in all NI animals.  
352 These results indicate that the tonsils might be the main source of infectious virus in buffalo rather than vesicular  
353 lesions as described for cattle [9]. When comparing both types of pharyngeal samples, higher viral genome copies  
354 were detected by qRT-PCR in tonsil swabs compared to probang ( $p < 0.001$ ); these results corroborate previous  
355 findings suggesting that tonsil swabs performed better than probang for FMDV diagnosis [10]. Viral loads in tonsil  
356 decreased over time; however, most of the animals still were shedding virus by day 30 of the experiment,  
357 therefore, with potential of still transmitting FMDV by the end of the experiment.

358 FMDV was first detected concomitantly in tonsil swabs and blood from most of the animals within the first week  
359 after FMDV infection, only three animals from the in-contact group showed earlier detection in tonsil swabs than  
360 blood, in contrast, one animal from the NI group showed FMDV in blood before tonsils. It has been reported in  
361 cattle that virus detected in oropharynx provides the earliest indication of infection; but virus in the blood and  
362 nasal fluid may also be good candidates for preclinical indicators of infectiousness when virus levels exceed  
363 certain thresholds [8]. In this study, the presence of virus genome in nasal swabs was not easily detected and not  
364 consistent within groups (5 out of 24 animals were negative at all time points).

365 Virus genome could be detected in blood from infected buffalo for approximately 4 to 6 dpi, which is a longer  
366 duration than measured in cattle (2-4 dpi) [1, 9, 43]. Viral genome in blood correlated closely with the detection  
367 of viral genome in tonsil swabs until the appearance of neutralizing antibodies. Soon after neutralizing antibodies  
368 were detected the virus was cleared completely from the bloodstream, around 6dpi. Similar to cattle, FMDV  
369 detection in the oropharynx or tonsil is not affected by the presence of neutralizing antibodies [12]. High FMDV  
370 genome copy numbers were maintained in palatine tonsil until late after infection when the titres of neutralizing  
371 antibodies were maximum. In fact, by 30 dpi, FMDV could be isolated from tonsil swabs and/or probang in 16 out  
372 of 24 animals and these were identified as carriers. We and others have demonstrated that buffalo can remain  
373 persistently infected with FMDV for months and years ( [10, 24, 44]) and although transmission from carrier  
374 buffalo to naïve is difficult to reproduce ([41, 45] a recent publication demonstrated that it is indeed the inclusion  
375 of occasional transmission from carriers that rescues FMDV from extinction in isolated African buffalo populations  
376 ([7] In our study, the development of carriers did not correlate with clinical signs or acute host responses, as  
377 suggested for cattle [18]. There was also no association between the carrier status and infection route or  
378 serotype.

379 Altogether, these results demonstrated similar dynamics of FMDV infection and immune responses after needle  
380 infection or direct in-contact challenge in African buffaloes compared to cattle, despite marked differences in the  
381 clinical outcome [10, 18]. The reasons for the different clinical outcomes between the host species remains  
382 unclear, in addition to the lack of understanding of the mechanisms responsible for the tissue distribution of FMD  
383 vesicles in cattle [46],. We have demonstrated for the first time that pyrexia is a consistent clinical sign of FMD in  
384 African buffalo. In general, needle challenge leads to a synchronous, faster and higher viral loads in blood and  
385 oropharynx and specific humoral immune response while the innate and acute immune responses were similar in  
386 needle and in-contact challenged buffaloes. These differences could be explained by the variable time and the  
387 lower dose of infection in the in-contact group compared to high doses of virus in NI. The SAT1 virus was detected  
388 more rapidly after challenge compared to the SAT2 and SAT3 viruses and transmitted more readily to naïve  
389 buffalo. These results agree with our previous studies where we showed during mixed infections in individual  
390 buffalo, over time SAT1 persisted for longer periods compared to SAT2 and SAT3 viruses. [10, 47, 48]. The results



391 are also consistent with our observation during a long-term study of an isolated buffalo herd that demonstrated  
392 SAT1 viruses persist more readily in a population [7]

393 These data provide important information to help understand the marked clinical differences between cattle and  
394 African buffalo in their response to FMDV infection. We have demonstrated that the typically mild clinical signs in  
395 African buffalo are not because virus replication or shedding are controlled and are not associated with a  
396 suppressed immune response to FMDV. We have also demonstrated that naïve buffaloes kept in contact with  
397 acutely infected buffaloes are readily infected despite the absence of high titre virus in vesicular fluids or lesions.  
398 Further studies are required to investigate cell mediated immune responses, and to determine if this arm of the  
399 immune response is accountable for the markedly different clinical outcomes in African buffalo compared to  
400 cattle. These data form a foundation for modelling the interplay of viral and immune response dynamics within  
401 African buffalo host and understanding the pathogenesis of these highly contagious viruses in populations of their  
402 natural reservoir host.

#### 403 **Abbreviations**

404 FMD: Foot and mouth disease; FMDV: foot and mouth disease virus; SAT: Southern Africa Territories; SAA: serum  
405 amyloid A, APP: acute phase proteins; OP: oropharynx; VNT: virus neutralizing test; MAbs: monoclonal antibodies;  
406 KNP: Kruger National Park; dpi: days post infection; NSP: non-structural protein; NI: needle infected; Co: contact  
407 infected; GCN: genome copy number; PI: percentage of inhibition; IFN; interferon, TNF; tumor necrosis factor.

#### 408 **Acknowledgements**

409 Authors thank Dave Cooper and the boards of the South African national parks for supplying the FMDV free  
410 buffalo used in these studies, and the animal unit staff at Kruger National Park in South Africa for their invaluable  
411 assistance with the *in vivo* experiment. We also thank J. Gonzalez for helping to plan the experiment, B. Martinez  
412 for believing in our purpose and L. Stevenson from the animal facilities at The Pirbright Institute for her excellent  
413 assistance with the inventory of the samples.

414 **Author's contributions**

415 EPM, BB, BC, AJ, NJ and FM conceived and planned the experiments. EPM, BB, FZ, BD, FM, LKL, KS, AJ, AH, LS and  
416 BC carried out the experiments. EPM, BB, FZ and KS generated the data. EPM, GLV, BB and AJ analysed the data  
417 and contributed to the interpretation of the results. EPM and BC took the lead in writing the manuscript. All  
418 authors provided critical feedback and reviewed the manuscript.

419 **Funding**

420 This work was supported by UK Research and Innovation of the United Kingdom and the United States  
421 Department of Agriculture (USDA) joint funding (funding grant BB/L011085/1). Eva Perez-Martin, Simon Gubbins  
422 and Bryan Charleston are funded by the BBSRC Institute Strategic Program on Enhanced Host Responses for  
423 Disease Control at The Pirbright Institute (BBS/E/I/00007030, BBS/E/I/00007032).

424 **Availability of data and materials**

425 The datasets analyzed during the current study are available from the corresponding authors upon request.

426 **Ethics approval**

427 Experimental protocols were approved by the Animal Ethical Committee of the Department of Agriculture, Land  
428 Reform and Rural Development (DALRRD), KNP-BC-02 and SANParks N013-12.

429 **Conflict of interest statement**

430 None of the authors of this paper has a financial or personal relationship with other people or organizations that  
431 could inappropriately influence or bias the content of the paper.

432 **Authors details**

433 <sup>1</sup> The Pirbright Institute, Woking, Surrey, United Kingdom; <sup>2</sup> Oregon State University, Corvallis, Portland, USA; <sup>3</sup>  
434 Agricultural Research Council of South Africa, Onderstepoort Veterinary Institute-Transboundary Animal Disease  
435 section (OVI-TAD), Vaccine and Diagnostic Development Programme, Onderstepoort, Gauteng, South Africa.; <sup>4</sup>  
436 State Veterinary Services, P.O. Box 12, Skukuza, 1350; <sup>5</sup> UCL Institute of Prion Diseases, London, United Kingdom; <sup>6</sup>

437 Brain Function Research Group, School of Physiology, Faculty of Health Sciences, University of the Witwatersrand,  
438 Johannesburg, South Africa; <sup>7</sup> South Africa Bill and Melinda Gates Foundation, Seattle, USA

## 439 References

- 440 1. Grubman MJ, Baxt B: **Foot-and-mouth disease**. *Clin Microbiol Rev* 2004, **17**(2):465-493.
- 441 2. Casey-Bryars M, Reeve R, Bastola U, Knowles NJ, Auty H, Bachanek-Bankowska K, Fowler VL, Fyumagwa R,  
442 Kazwala R, Kibona T *et al*: **Waves of endemic foot-and-mouth disease in eastern Africa suggest feasibility**  
443 **of proactive vaccination approaches**. *Nature ecology & evolution* 2018, **2**(9):1449-1457.
- 444 3. Brito BP, Rodriguez LL, Hammond JM, Pinto J, Perez AM: **Review of the Global Distribution of Foot-and-**  
445 **Mouth Disease Virus from 2007 to 2014**. *Transboundary and emerging diseases* 2017, **64**(2):316-332.
- 446 4. Chis Ster I, Dodd PJ, Ferguson NM: **Within-farm transmission dynamics of foot and mouth disease as**  
447 **revealed by the 2001 epidemic in Great Britain**. *Epidemics* 2012, **4**(3):158-169.
- 448 5. Eblé PL, Orsel K, van Hemert-Kluitenberg F, Dekker A: **Transmission characteristics and optimal**  
449 **diagnostic samples to detect an FMDV infection in vaccinated and non-vaccinated sheep**. *Veterinary*  
450 *microbiology* 2015, **177**(1-2):69-77.
- 451 6. Hayer SS, VanderWaal K, Ranjan R, Biswal JK, Subramaniam S, Mohapatra JK, Sharma GK, Rout M, Dash  
452 BB, Das B *et al*: **Foot-and-mouth disease virus transmission dynamics and persistence in a herd of**  
453 **vaccinated dairy cattle in India**. *Transboundary and emerging diseases* 2018, **65**(2):e404-e415.
- 454 7. Jolles A, Gorsich E, Gubbins S, Beechler B, Buss P, Juleff N, de Klerk-Lorist LM, Maree F, Perez-Martin E,  
455 van Schalkwyk OL *et al*: **Endemic persistence of a highly contagious pathogen: Foot-and-mouth disease**  
456 **in its wildlife host**. *Science (New York, NY)* 2021, **374**(6563):104-109.
- 457 8. Chase-Topping ME, Handel I, Bankowski BM, Juleff ND, Gibson D, Cox SJ, Windsor MA, Reid E, Doel C,  
458 Howey R *et al*: **Understanding foot-and-mouth disease virus transmission biology: identification of the**  
459 **indicators of infectiousness**. *Veterinary research* 2013, **44**:46.
- 460 9. Charleston B, Bankowski BM, Gubbins S, Chase-Topping ME, Schley D, Howey R, Barnett PV, Gibson D,  
461 Juleff ND, Woolhouse ME: **Relationship between clinical signs and transmission of an infectious disease**  
462 **and the implications for control**. *Science (New York, NY)* 2011, **332**(6030):726-729.
- 463 10. Maree F, de Klerk-Lorist LM, Gubbins S, Zhang F, Seago J, Perez-Martin E, Reid L, Scott K, van Schalkwyk L,  
464 Bengis R *et al*: **Differential Persistence of Foot-and-Mouth Disease Virus in African Buffalo Is Related to**  
465 **Virus Virulence**. *Journal of virology* 2016, **90**(10):5132-5140.
- 466 11. Arzt J, Juleff N, Zhang Z, Rodriguez LL: **The pathogenesis of foot-and-mouth disease I: viral pathways in**  
467 **cattle**. *Transboundary and emerging diseases* 2011, **58**(4):291-304.
- 468 12. Stenfeldt C, Eschbaumer M, Rekant SI, Pacheco JM, Smoliga GR, Hartwig EJ, Rodriguez LL, Arzt J: **The Foot-**  
469 **and-Mouth Disease Carrier State Divergence in Cattle**. *Journal of virology* 2016, **90**(14):6344-6364.
- 470 13. Perez-Martin E, Weiss M, Diaz-San Segundo F, Pacheco JM, Arzt J, Grubman MJ, de los Santos T: **Bovine**  
471 **type III interferon significantly delays and reduces the severity of foot-and-mouth disease in cattle**.  
472 *Journal of virology* 2012, **86**(8):4477-4487.
- 473 14. Perez-Martin E, Diaz-San Segundo F, Weiss M, Sturza DF, Dias CC, Ramirez-Medina E, Grubman MJ, de los  
474 Santos T: **Type III interferon protects swine against foot-and-mouth disease**. *Journal of interferon &*  
475 *cytokine research : the official journal of the International Society for Interferon and Cytokine Research*  
476 2014, **34**(10):810-821.
- 477 15. Dias CC, Moraes MP, Weiss M, Diaz-San Segundo F, Perez-Martin E, Salazar AM, de los Santos T, Grubman  
478 MJ: **Novel antiviral therapeutics to control foot-and-mouth disease**. *Journal of interferon & cytokine*  
479 *research : the official journal of the International Society for Interferon and Cytokine Research* 2012,  
480 **32**(10):462-473.
- 481 16. Medina GN, Segundo FD, Stenfeldt C, Arzt J, de Los Santos T: **The Different Tactics of Foot-and-Mouth**  
482 **Disease Virus to Evade Innate Immunity**. *Front Microbiol* 2018, **9**:2644.

- 483 17. Moraes MP, de Los Santos T, Koster M, Turecek T, Wang H, Andreyev VG, Grubman MJ: **Enhanced**  
484 **antiviral activity against foot-and-mouth disease virus by a combination of type I and II porcine**  
485 **interferons.** *Journal of virology* 2007, **81**(13):7124-7135.
- 486 18. Stenfeldt C, Heegaard PM, Stockmarr A, Tjørnehøj K, Belsham GJ: **Analysis of the acute phase responses**  
487 **of serum amyloid a, haptoglobin and type 1 interferon in cattle experimentally infected with foot-and-**  
488 **mouth disease virus serotype O.** *Veterinary research* 2011, **42**(1):66.
- 489 19. Glidden CK, Beechler B, Buss PE, Charleston B, de Klerk-Lorist LM, Maree FF, Muller T, Pérez-Martin E,  
490 Scott KA, van Schalkwyk OL *et al*: **Detection of Pathogen Exposure in African Buffalo Using Non-Specific**  
491 **Markers of Inflammation.** *Frontiers in immunology* 2017, **8**:1944.
- 492 20. Bronsvort BM, Parida S, Handel I, McFarland S, Fleming L, Hamblin P, Kock R: **Serological survey for foot-**  
493 **and-mouth disease virus in wildlife in eastern Africa and estimation of test parameters of a**  
494 **nonstructural protein enzyme-linked immunosorbent assay for buffalo.** *Clin Vaccine Immunol* 2008,  
495 **15**(6):1003-1011.
- 496 21. Di Nardo A, Libeau G, Chardonnet B, Chardonnet P, Kock RA, Parekh K, Hamblin P, Li Y, Parida S, Sumption  
497 KJ: **Serological profile of foot-and-mouth disease in wildlife populations of West and Central Africa with**  
498 **special reference to Syncerus caffer subspecies.** *Veterinary research* 2015, **46**(1):77.
- 499 22. Brückner GK, Vosloo W, Du Plessis BJ, Kloeck PE, Connoway L, Ekron MD, Weaver DB, Dickason CJ,  
500 Schreuder FJ, Marais T *et al*: **Foot and mouth disease: the experience of South Africa.** *Revue scientifique*  
501 *et technique (International Office of Epizootics)* 2002, **21**(3):751-764.
- 502 23. Weaver GV, Domenech J, Thiermann AR, Karesh WB: **FOOT AND MOUTH DISEASE: A LOOK FROM THE**  
503 **WILD SIDE.** *Journal of Wildlife Diseases* 2013, **49**(4):759-785, 727.
- 504 24. Bengis RG, Thomson GR, Hedger RS, De Vos V, Pini A: **Foot-and-mouth disease and the African buffalo**  
505 **(Syncerus caffer). 1. Carriers as a source of infection for cattle.** *The Onderstepoort journal of veterinary*  
506 *research* 1986, **53**(2):69-73.
- 507 25. Condy JB, Hedger RS, Hamblin C, Barnett IT: **The duration of the foot-and-mouth disease virus carrier**  
508 **state in African buffalo (i) in the individual animal and (ii) in a free-living herd.** *Comparative*  
509 *immunology, microbiology and infectious diseases* 1985, **8**(3-4):259-265.
- 510 26. Fukase E: **The initial cost estimate of the global FAO/OIE strategy for the control of foot and mouth**  
511 **disease.** In: *The Global Foot and Mouth Disease Control Strategy Strengthening animal health systems*  
512 *through improved control of major diseases*
- 513 2012.
- 514 27. Omondi G, Alkhamis MA, Obanda V, Gakuya F, Sangula A, Pauszek S, Perez A, Ngulu S, van Aardt R, Arzt J  
515 *et al*: **Phylogeographical and cross-species transmission dynamics of SAT1 and SAT2 foot-and-mouth**  
516 **disease virus in Eastern Africa.** *Mol Ecol* 2019, **28**(11):2903-2916.
- 517 28. Jori F, Etter E: **Transmission of foot and mouth disease at the wildlife/livestock interface of the Kruger**  
518 **National Park, South Africa: Can the risk be mitigated?** *Preventive veterinary medicine* 2016, **126**:19-29.
- 519 29. Bastos ADS, Haydon DT, Sangaré O, Boshoff CI, Edrich JL, Thomson GR: **The implications of virus diversity**  
520 **within the SAT 2 serotype for control of foot-and-mouth disease in sub-Saharan Africa.** *The Journal of*  
521 *general virology* 2003, **84**(Pt 6):1595-1606.
- 522 30. Hall MD, Knowles NJ, Wadsworth J, Rambaut A, Woolhouse ME: **Reconstructing geographical**  
523 **movements and host species transitions of foot-and-mouth disease virus serotype SAT 2.** *mBio* 2013,  
524 **4**(5):e00591-00513.
- 525 31. Dyason E: **Summary of foot-and-mouth disease outbreaks reported in and around the Kruger National**  
526 **Park, South Africa, between 1970 and 2009.** *J S Afr Vet Assoc* 2010, **81**(4):201-206.
- 527 32. Zhang ZD, Kitching RP: **The localization of persistent foot and mouth disease virus in the epithelial cells**  
528 **of the soft palate and pharynx.** *Journal of comparative pathology* 2001, **124**(2-3):89-94.
- 529 33. Brehm KE, Ferris NP, Lenk M, Riebe R, Haas B: **Highly sensitive fetal goat tongue cell line for detection**  
530 **and isolation of foot-and-mouth disease virus.** *Journal of clinical microbiology* 2009, **47**(10):3156-3160.
- 531 34. Fray MD, Supple EA, Morrison WI, Charleston B: **Germinal centre localization of bovine viral diarrhoea**  
532 **virus in persistently infected animals.** *The Journal of general virology* 2000, **81**(Pt 7):1669-1673.

- 533 35. Botha A, Lease HM, Fuller A, Mitchell D, Hetem RS: **Biologging subcutaneous temperatures to detect**  
534 **orientation to solar radiation remotely in savanna antelope.** *J Exp Zool A Ecol Integr Physiol* 2019,  
535 **331(5):267-279.**
- 536 36. Callahan JD, Brown F, Osorio FA, Sur JH, Kramer E, Long GW, Lubroth J, Ellis SJ, Shoulars KS, Gaffney KL *et*  
537 *al*: **Use of a portable real-time reverse transcriptase-polymerase chain reaction assay for rapid**  
538 **detection of foot-and-mouth disease virus.** *Journal of the American Veterinary Medical Association* 2002,  
539 **220(11):1636-1642.**
- 540 37. Colenutt C, Brown E, Nelson N, Paton DJ, Eblé P, Dekker A, Gonzales JL, Gubbins S: **Quantifying the**  
541 **Transmission of Foot-and-Mouth Disease Virus in Cattle via a Contaminated Environment.** *mBio* 2020,  
542 **11(4).**
- 543 38. OIE: **OIE Terrestrial Manual, Chapter 3.1.8 Foot and mouth disease.** In.; 2021.
- 544 39. Barnett PV, Statham RJ, Vosloo W, Haydon DT: **Foot-and-mouth disease vaccine potency testing:**  
545 **determination and statistical validation of a model using a serological approach.** *Vaccine* 2003,  
546 **21(23):3240-3248.**
- 547 40. Reid E, Juleff N, Windsor M, Gubbins S, Roberts L, Morgan S, Meyers G, Perez-Martin E, Tchilian E,  
548 Charleston B *et al*: **Type I and III IFNs Produced by Plasmacytoid Dendritic Cells in Response to a**  
549 **Member of the Flaviviridae Suppress Cellular Immune Responses.** *Journal of immunology (Baltimore, Md*  
550 *: 1950)* 2016, **196(10):4214-4226.**
- 551 41. Vosloo W, Bastos AD, Kirkbride E, Esterhuysen JJ, van Rensburg DJ, Bengis RG, Keet DW, Thomson GR:  
552 **Persistent infection of African buffalo (*Syncerus caffer*) with SAT-type foot-and-mouth disease viruses:**  
553 **rate of fixation of mutations, antigenic change and interspecies transmission.** *The Journal of general*  
554 *virology* 1996, **77 ( Pt 7):1457-1467.**
- 555 42. Ferris NP, Condy JB, Barnett IT, Armstrong RM: **Experimental infection of eland (*Taurotragus oryx*), sable**  
556 **antelope (*Ozanna grandicomis*) and buffalo (*Syncerus caffer*) with foot-and-mouth disease virus.**  
557 *Journal of comparative pathology* 1989, **101(3):307-316.**
- 558 43. Ramulongo TD, Maree FF, Scott K, Opperman P, Mutowembwa P, Theron J: **Pathogenesis, biophysical**  
559 **stability and phenotypic variance of SAT2 foot-and-mouth disease virus.** *Veterinary microbiology* 2020,  
560 **243:108614.**
- 561 44. Thomson GR, Vosloo W, Esterhuysen JJ, Bengis RG: **Maintenance of foot and mouth disease viruses in**  
562 **buffalo (*Syncerus caffer* Sparrman, 1779) in southern Africa.** *Revue scientifique et technique*  
563 *(International Office of Epizootics)* 1992, **11(4):1097-1107.**
- 564 45. Gainaru MD, Thomson GR, Bengis RG, Esterhuysen JJ, Bruce W, Pini A: **Foot-and-mouth disease and the**  
565 **African buffalo (*Syncerus caffer*). II. Virus excretion and transmission during acute infection.** *The*  
566 *Onderstepoort journal of veterinary research* 1986, **53(2):75-85.**
- 567 46. Giorgakoudi K, Gubbins S, Ward J, Juleff N, Zhang Z, Schley D: **Using Mathematical Modelling to Explore**  
568 **Hypotheses about the Role of Bovine Epithelium Structure in Foot-And-Mouth Disease Virus-Induced**  
569 **Cell Lysis.** *PloS one* 2015, **10(10):e0138571.**
- 570 47. Cortey M, Ferretti L, Pérez-Martín E, Zhang F, de Klerk-Lorist L-M, Scott K, Freimanis G, Seago J, Ribeca P,  
571 van Schalkwyk L *et al*: **Persistent Infection of African Buffalo (*Syncerus caffer*) with Foot-and-Mouth**  
572 **Disease Virus: Limited Viral Evolution and No Evidence of Antibody Neutralization Escape.** *Journal of*  
573 *virology* 2019, **93(15):e00563-00519.**
- 574 48. Ferretti L, Perez-Martin E, Zhang F, de Klerk-Lorist LM, Van Schalkwyk L, Maree F, Charleston B, Ribeca P:  
575 **Pervasive within-host recombination and epistasis as major determinants of the molecular evolution of**  
576 **the Foot-and Mouth Disease Virus capsid** *BioRxiv* 2018.

577

578

579

580 **Figure legends**

581 **Figure 1. Body temperature in FMDV infected African buffalo.** Body [7]temperature, measured by temperature-  
582 sensitive data loggers, of each individual buffalo after needle infection with FMDV SAT1, SAT2 or SAT3. Panel a  
583 represents the residuals from the fitted line, with a value above the dotted line considered a fever if the residuals  
584 stay above the line for 6 consecutive hours (72 readings). Panel b represents the raw temperatures over time. The  
585 dotted lines represent the normal temperatures as determined by the calculated reference range. Body  
586 temperature fluctuates during the day and all animals show high temperature at 1-1.7 dpi and remained elevated  
587 for between 2-5 dpi with a peak of maximum temperature of  $>41^{\circ}\text{C}$  between 1.5-3.1 dpi. SAT2 infected animals  
588 have an elevated temperature and for longer duration compared to SAT1 and SAT3 (p 0.08 and p 0.016,  
589 respectively). All buffalo from the SAT1 group and 1 animal from SAT3 show a short second peak of high  
590 temperature at day 8 that lasted approximately 1 day only.

591 **Figure 2. FMDV genome copy number dynamics in African buffalo.** Detection of FMDV genome copy numbers  
592 (GCN) by qRT-PCR in serum (a), tonsil swab (b) and nasal swab (c) from animals needle infected with SAT1, SAT2  
593 and SAT3 FMDV serotypes (blue lines, round symbol) *versus* contact challenge (pink, square symbol). NI animals  
594 were challenged on day 0 of the study, and contact animals were mixed with NI groups on day 2. Graphs  
595 represent the mean and SEM for each group at each time point.

596 **Figure 3. Specific humoral immune response induced by FMDV infection.** Neutralizing antibody titers in log<sub>10</sub> (a)  
597 and presence of antibody levels against FMDV non-structural proteins (NSP) (b), induced by SAT1, SAT2 and SAT3  
598 FMDV infected animals by needle infection (blue lines, round symbol) or by contact challenge (pink, square  
599 symbol). NSP results are expressed by percentage of inhibition (PI) and cut-off is determined at 50% (dash line) .  
600 Graphs represent the mean and SEM for each group at each time point.

601 **Figure 4. Innate immune response and acute phase proteins induced by FMDV in African buffalo.**  
602 Concentrations of SAA (a), hatoglobin (b), type I/III IFN (c) and IFN $\gamma$  (d) in serum from animals infected with SAT1,  
603 SAT2 or SAT3 FMDV serotypes by NI (blue lines, round symbol) or contact challenge (pink lines, square symbol).  
604 Graphs represent the mean and SEM for each group at each time point. Cut-offs for SAA and hatoglobin were



605 established at 546 and 802 ng/ul and cut off for type I IFN and IFN $\gamma$  was established at 0.76 iu/ml and 1.04 ng/ml,  
 606 respectively.

607 **Table 1.** Calculations of the residuals of body temperature for all African buffalo infected with SAT1, SAT2 and  
 608 SAT3 over time; and its median values (minimum-maximum) and the Kruskal-Wallis statistics stratified by  
 609 serotype.

| Group                            | Animal ID | Max Temp            | Time of Peak (days) | Time of Initial Elevation (days) | Length of Fever in Days | Time of 2nd peak (days) | Length of Fever 2nd peak |
|----------------------------------|-----------|---------------------|---------------------|----------------------------------|-------------------------|-------------------------|--------------------------|
| <b>SAT1</b>                      | 7         | 41.88               | 1.61                | 1.36                             | 3.01                    | 8.38                    | 0.62                     |
| <b>SAT1</b>                      | 11        | 41.4                | 1.65                | 1.37                             | 2.8                     | 8.4                     | 1.23                     |
| <b>SAT1</b>                      | 13        | 41.98               | 1.65                | 1.1                              | 3.14                    | 7                       | 2.51                     |
| Median values (minimum- maximum) |           | 41.88 (41.44-41.98) | 1.65 (1.61-1.65)    | 1.36 (1.10-1.37)                 | 3.01 (2.8-3.14)         |                         |                          |
| <b>SAT2</b>                      | 8         | 41.04               | 3.18                | 1                                | 5.32                    | NA                      | NA                       |
| <b>SAT2</b>                      | 20        | 41.34               | 2.53                | 1.09                             | 3.27                    | NA                      | NA                       |
| <b>SAT2</b>                      | 28        | 42                  | 1.66                | 1.01                             | 5.31                    | NA                      | NA                       |
| <b>SAT2</b>                      | 32        | 41.26               | 1.57                | 1.01                             | 5.32                    | NA                      | NA                       |
| Median values (minimum- maximum) |           | 41.3 (41.04-42)     | 2.09 (1.57-3.18)    | 1.01 (1.0-1.09)                  | 5.32 (3.27-5.32)        |                         |                          |
| <b>SAT3</b>                      | 26        | 40.91               | 1.83                | 1.72                             | 2.58                    | NA                      | NA                       |
| <b>SAT3</b>                      | 27        | 41.15               | 1.75                | 1.52                             | 2.87                    | NA                      | NA                       |
| <b>SAT3</b>                      | 34        | 42.05               | 1.68                | 1.13                             | 3.21                    | 8.74                    | 1.66                     |
| <b>SAT3</b>                      | 35        | 41.07               | 2.99                | 1.28                             | 3.05                    | NA                      | NA                       |
| Median values (minimum- maximum) |           | 41.11 (40.91-42.05) | 1.79 (1.68-2.99)    | 1.4 (1.13-1.72)                  | 2.96 (2.5-3.21)         |                         |                          |
| P-value                          |           | 0.47                | 0.164               | <b>0.0088</b>                    | <b>0.016</b>            |                         |                          |

610

611

612

613

614

615

616

617

618 **Table 2.** Comparison of FMDV genome ( $\text{Log}_{10}$  GCN/ml) and virus isolation (indicated with an underline) in serum,  
 619 probang and tonsil swab along the study measured by 3D qRT -PCR and by SAT specific qRT -PCR in tonsil swab on  
 620 day 30. Cut-off was established at 1 GCN/5ul of RNA. Those samples that were FMDV isolation positive are  
 621 indicated with an underline.

| FMDV challenge                       | Group (FMDV strain) | ID animal | $\text{Log}_{10}$ FMDV GCN/ml serum |             |             |             |        |        | $\text{Log}_{10}$ FMDV GCN/ml probang |             |             | $\text{Log}_{10}$ FMDV GCN/ml tonsil swab |             |             | $\text{Log}_{10}$ FMDV SAT specific GCN/ml tonsil swab at day 30 |      |      |
|--------------------------------------|---------------------|-----------|-------------------------------------|-------------|-------------|-------------|--------|--------|---------------------------------------|-------------|-------------|-------------------------------------------|-------------|-------------|------------------------------------------------------------------|------|------|
|                                      |                     |           | Day 2                               | Day 4       | Day 6       | Day 8       | Day 11 | Day 14 | Day 8                                 | Day 14      | Day 30      | Day 8                                     | Day 14      | Day 30      | SAT1                                                             | SAT2 | SAT3 |
| Needle infected (NI)                 | SAT1                | 7         | 7.67                                | <u>7.36</u> | 3.53        | 0.00        | 0.00   | 0.00   | <u>5.88</u>                           | <u>5.39</u> | 5.01        | <u>7.62</u>                               | <u>7.28</u> | <u>8.07</u> | 8.51                                                             | 0.00 | 0.00 |
|                                      | SAT1                | 10        | <u>7.35</u>                         | 5.56        | 0.00        | 0.00        | 0.00   | 0.00   | <u>5.13</u>                           | <u>5.89</u> | 3.99        | <u>7.64</u>                               | <u>7.10</u> | <u>8.05</u> | 8.25                                                             | 0.00 | 0.00 |
|                                      | SAT1                | 11        | <u>6.31</u>                         | 5.80        | 0.00        | 0.00        | 0.00   | 0.00   | <u>4.91</u>                           | <u>4.27</u> | <u>4.56</u> | <u>7.71</u>                               | <u>8.21</u> | <u>8.38</u> | 8.90                                                             | 0.00 | 0.00 |
|                                      | SAT1                | 13        | <u>6.49</u>                         | <u>6.79</u> | 3.27        | 0.00        | 0.00   | 0.00   | <u>3.93</u>                           | <u>5.08</u> | <u>3.95</u> | <u>5.59</u>                               | <u>7.14</u> | <u>7.47</u> | 7.92                                                             | 0.00 | 0.00 |
|                                      | SAT2                | 8         | <u>6.40</u>                         | 3.84        | 0.00        | 0.00        | 0.00   | 0.00   | <u>5.04</u>                           | 0.00        | 0.00        | <u>7.28</u>                               | <u>7.63</u> | <u>7.68</u> | 0.00                                                             | 7.21 | 0.00 |
|                                      | SAT2                | 20        | <u>7.31</u>                         | 5.91        | 3.50        | 0.00        | 0.00   | 0.00   | <u>4.53</u>                           | <u>4.40</u> | 0.00        | <u>8.03</u>                               | <u>8.43</u> | 5.76        | 0.00                                                             | 5.67 | 0.00 |
|                                      | SAT2                | 28        | <u>5.20</u>                         | <u>2.63</u> | 3.85        | 0.00        | 2.75   | 0.00   | <u>5.97</u>                           | <u>2.94</u> | 3.82        | <u>6.70</u>                               | <u>6.80</u> | 4.85        | 0.00                                                             | 5.32 | 0.00 |
|                                      | SAT2                | 32        | 6.09                                | 5.05        | 5.22        | 0.00        | 0.00   | 0.00   | <u>6.42</u>                           | 3.81        | 0.00        | <u>7.67</u>                               | 6.04        | <u>7.96</u> | 0.00                                                             | 7.95 | 0.00 |
|                                      | SAT3                | 26        | <u>7.46</u>                         | 3.20        | 0.00        | 0.00        | 0.00   | 0.00   | <u>5.74</u>                           | <u>5.03</u> | 3.32        | <u>7.31</u>                               | <u>7.44</u> | <u>7.27</u> | 0.00                                                             | 0.00 | 8.04 |
|                                      | SAT3                | 27        | <u>5.46</u>                         | <u>5.38</u> | 0.00        | 0.00        | 0.00   | 0.00   | 3.42                                  | 2.39        | 2.97        | <u>6.44</u>                               | 4.42        | 6.00        | 0.00                                                             | 0.00 | 6.85 |
|                                      | SAT3                | 34        | 5.22                                | 4.09        | 0.00        | 0.00        | 0.00   | 0.00   | <u>4.64</u>                           | <u>4.04</u> | 3.51        | <u>7.04</u>                               | <u>6.52</u> | <u>6.51</u> | 0.00                                                             | 0.00 | 6.87 |
|                                      | SAT3                | 35        | <u>5.70</u>                         | 4.01        | 0.00        | 0.00        | 0.00   | 0.00   | <u>3.63</u>                           | 3.12        | 3.35        | <u>6.14</u>                               | <u>6.59</u> | <u>6.19</u> | 0.00                                                             | 0.00 | 8.40 |
| In-contact                           | SAT1                | 2         |                                     | 3.32        | <u>5.87</u> | <u>5.79</u> | 0.00   | 0.00   | <u>4.59</u>                           | <u>3.20</u> | 0.00        | <u>6.31</u>                               |             |             |                                                                  |      |      |
|                                      | SAT1                | 4         |                                     | 2.74        | 5.55        | 4.84        | 0.00   | 0.00   | <u>5.66</u>                           | <u>5.29</u> | <u>4.89</u> | <u>8.93</u>                               | <u>6.87</u> | <u>7.29</u> | 7.82                                                             | 0.00 | 0.00 |
|                                      | SAT1                | 19        |                                     | 4.41        | 5.51        | 4.03        | 0.00   | 0.00   | <u>6.34</u>                           | <u>4.30</u> | 0.00        | <u>8.96</u>                               | <u>7.62</u> | <u>7.15</u> | 8.06                                                             | 0.00 | 0.00 |
|                                      | SAT1                | 33        |                                     | 4.10        | <u>8.39</u> | 3.72        | 0.00   | 0.00   | <u>5.33</u>                           | <u>5.27</u> | 5.15        | <u>9.30</u>                               | <u>7.18</u> | <u>8.30</u> | 8.65                                                             | 0.00 | 0.00 |
|                                      | SAT2                | 5         |                                     | 2.50        | 2.38        | 0.00        | 0.00   | 0.00   | <u>4.44</u>                           | <u>3.69</u> | 0.00        | <u>8.89</u>                               | <u>6.53</u> | 5.86        | 0.00                                                             | 5.33 | 0.00 |
|                                      | SAT2                | 9         |                                     | 0.00        | <u>5.64</u> | 4.80        | 0.00   | 0.00   | <u>4.36</u>                           | 4.24        | 0.00        | <u>8.24</u>                               | <u>7.49</u> | 6.25        | 0.00                                                             | 6.15 | 0.00 |
|                                      | SAT2                | 22        |                                     | 0.00        | 3.08        | 4.55        | 0.00   | 0.00   | <u>4.57</u>                           | 0.00        | 0.00        | <u>6.84</u>                               | <u>6.83</u> | 5.89        |                                                                  |      |      |
|                                      | SAT2                | 29        |                                     | 0.00        | 3.71        | 0.00        | 0.00   | 0.00   | <u>5.22</u>                           | 4.53        | 3.33        | <u>6.66</u>                               | <u>6.92</u> | <u>5.50</u> | 0.00                                                             | 5.41 | 0.00 |
|                                      | SAT3                | 12        |                                     | 0.00        | 0.00        | <u>5.37</u> | 5.59   | 0.00   | <u>4.64</u>                           | <u>4.44</u> | <u>4.20</u> | <u>7.23</u>                               | <u>7.60</u> | <u>5.68</u> | 0.00                                                             | 0.00 | 6.25 |
|                                      | SAT3                | 15        |                                     | 0.00        | 0.00        | 0.00        | 0.00   | 5.42   | 0.00                                  | <u>3.96</u> | <u>4.88</u> |                                           | <u>6.74</u> | 5.63        | 0.00                                                             | 0.00 | 6.59 |
|                                      | SAT3                | 16        |                                     | 0.00        | 2.38        | <u>6.20</u> | 0.00   | 0.00   | <u>4.93</u>                           | 2.87        | <u>3.92</u> | <u>7.26</u>                               | <u>7.12</u> | <u>7.57</u> | 0.00                                                             | 0.00 | 8.40 |
|                                      | SAT3                | 17        |                                     | 0.00        | <u>6.22</u> | 5.19        | 0.00   | 0.00   | 0.00                                  | 3.53        | 4.30        | <u>6.42</u>                               | <u>7.70</u> | <u>5.67</u> | 0.00                                                             | 0.00 | 6.65 |
| # of samples RT qPCR positive        |                     |           | 12                                  | 17.00       | 15.00       | 9.00        | 2.00   | 1.00   | 23.00                                 | 22.00       | 16.00       | 23.00                                     | 23.00       | 23.00       |                                                                  |      |      |
| # of samples RT qPCR and VI positive |                     |           | 8                                   | 3.00        | 3.00        | 3.00        |        | 0.00   | 22.00                                 | 15.00       | 8.00        | 23.00                                     | 22.00       | 15.00       |                                                                  |      |      |
| VI positive (%)                      |                     |           | 66.7                                | 17.6        | 20.0        | 33.3        | 0.0    | 0.0    | 95.7                                  | 68.2        | 50.0        | 100.0                                     | 95.7        | 65.2        |                                                                  |      |      |
| Averages VI (%)                      |                     |           |                                     |             | 22.9        |             |        |        |                                       | 71.3        |             |                                           | 87          |             |                                                                  |      |      |

622

623

624

625 **Table 3.** Number of animals with vesicles and number of animals that were carrier by day 30 of the study

|                           | NI   |      |      |              | Contact |      |      |                   | p-value |
|---------------------------|------|------|------|--------------|---------|------|------|-------------------|---------|
|                           | SAT1 | SAT2 | SAT3 | Total NI (%) | SAT1    | SAT2 | SAT3 | Total contact (%) |         |
| Clinical signs (vesicles) | 2    | 0    | 0    | 2 (16.7)     | 0       | 0    | 1    | 1 (8.3)           | 1       |
| Carrier at day 30 (VI+)   | 4    | 2    | 3    | 9 (75)       | 3       | 1    | 3    | 7 (58.3)          | 0.556   |

626

627

628

629

630

631

632





Figure 1.

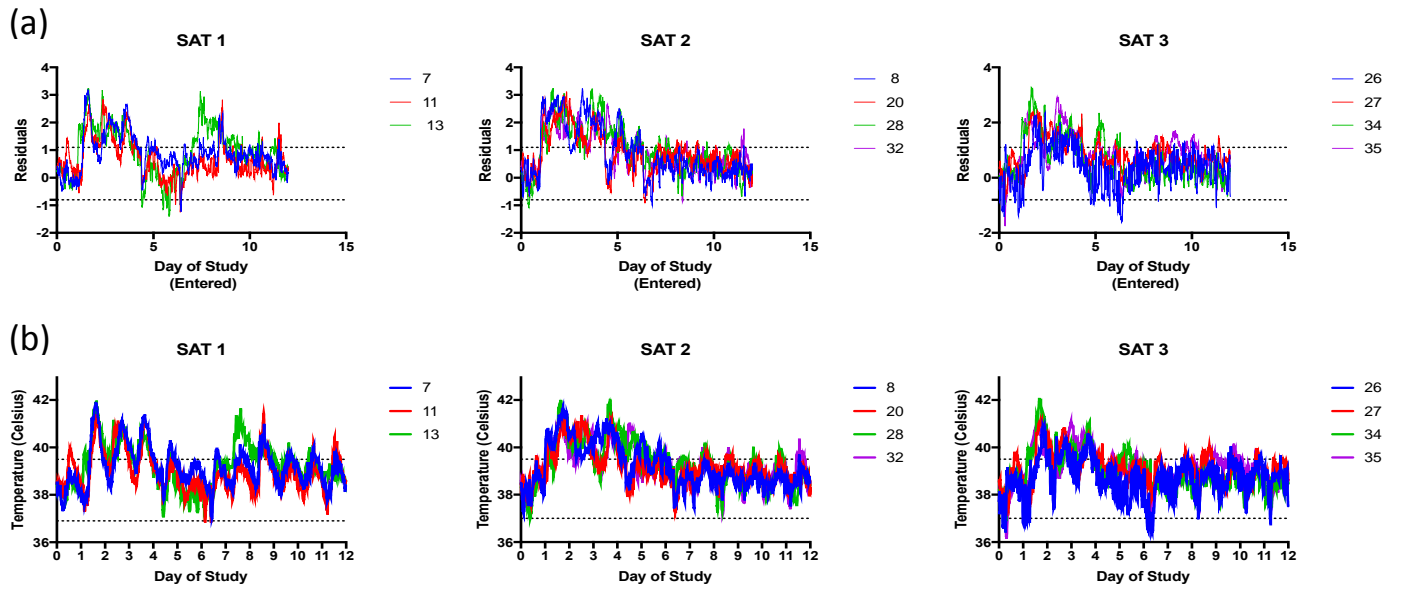

Figure 2.

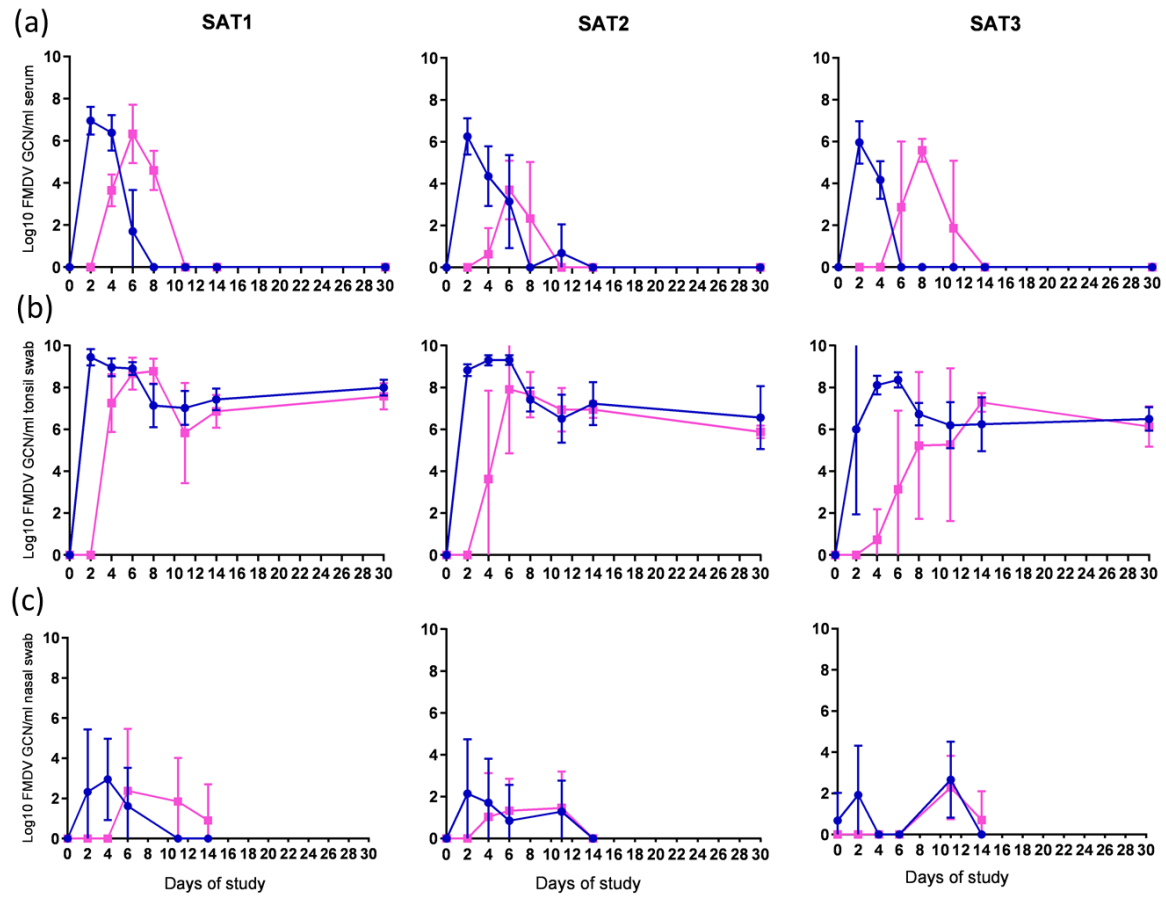

Figure 3.

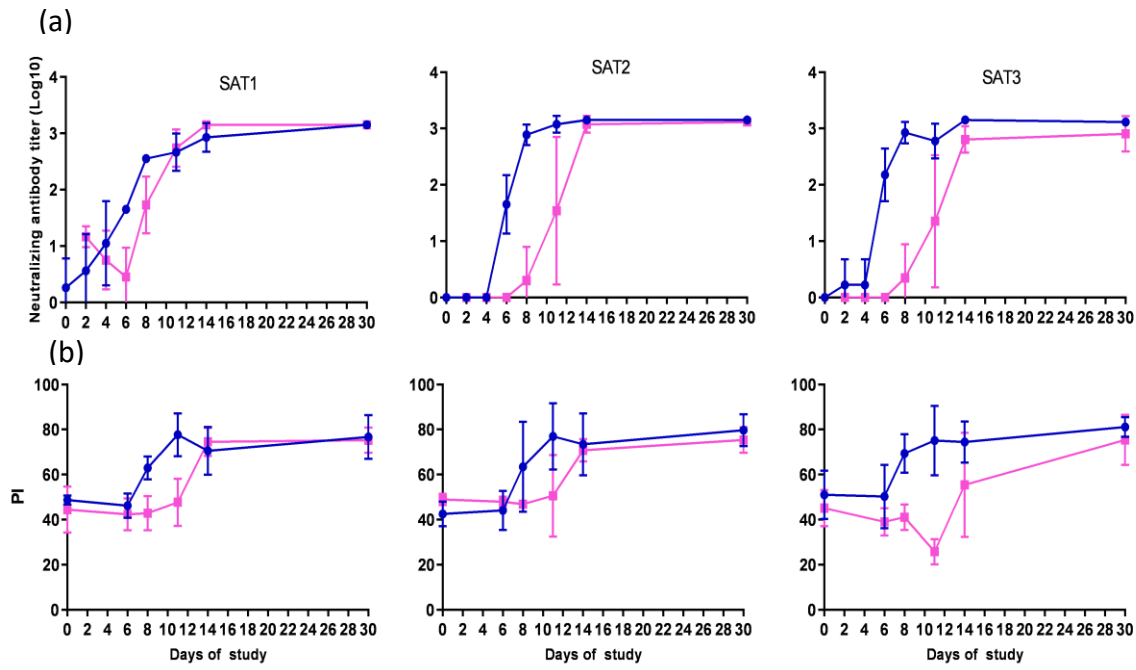

Figure 4

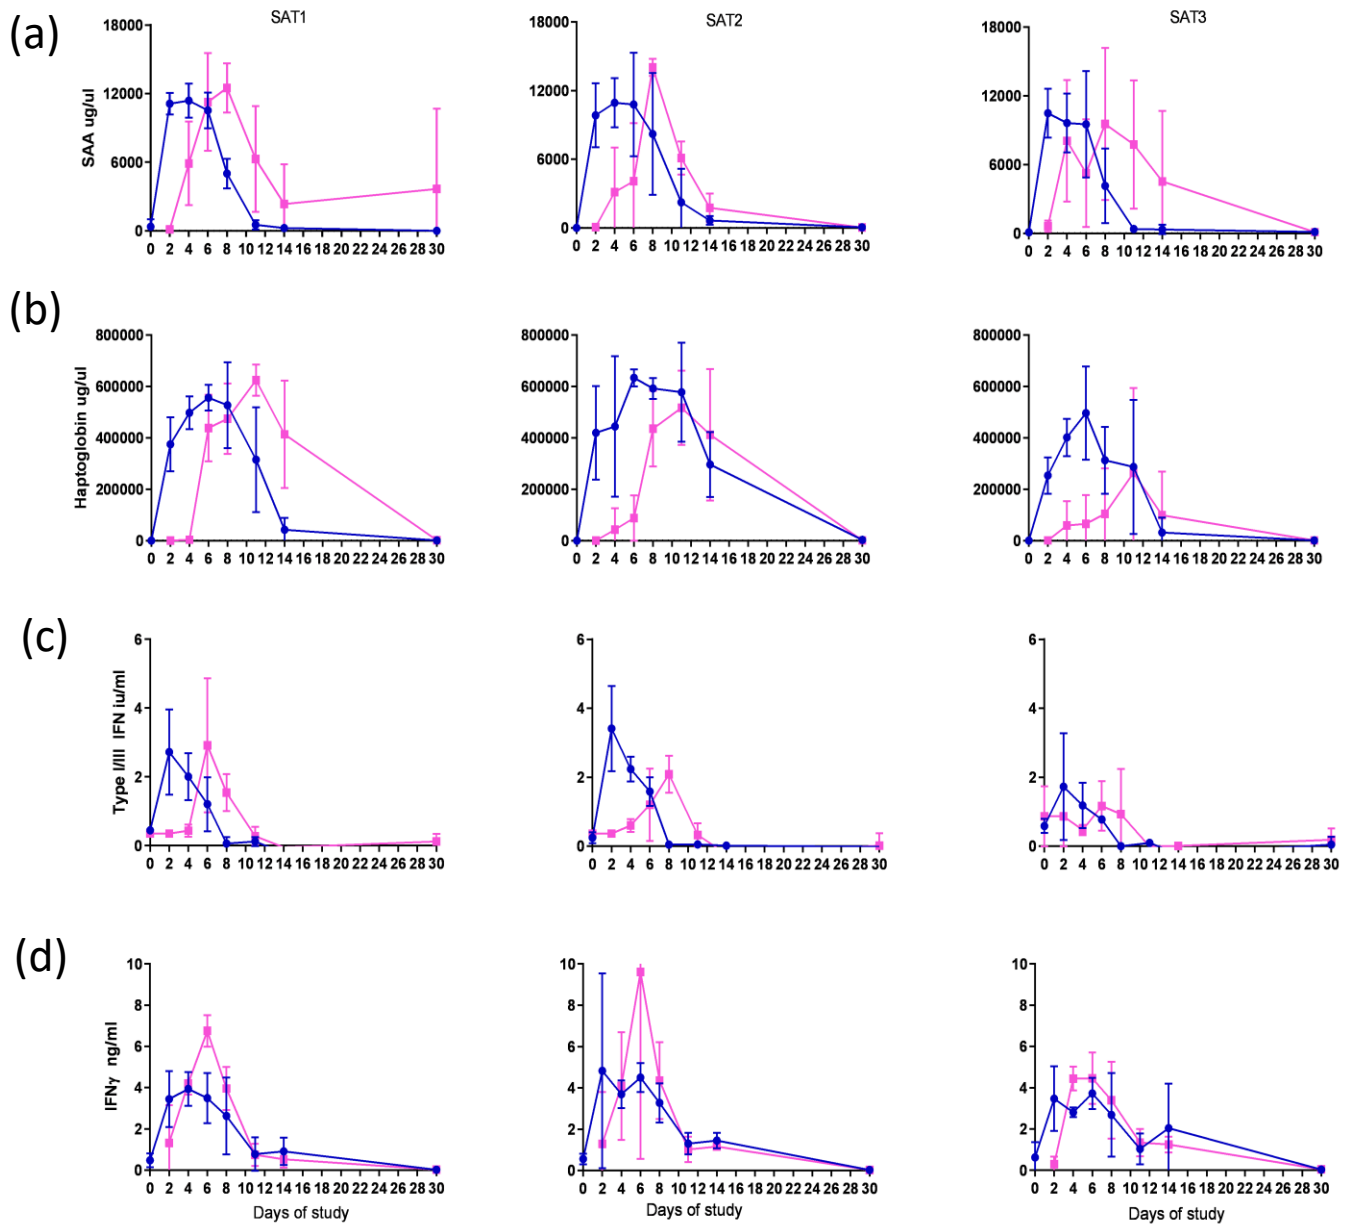

Source: http://biorxiv.org/content/10.1101/2021.11.24.469808v1.full.pdf
